# Supplementary material for: Spontaneous EBV-Reactivation during B Cell Differentiation as a Model for Polymorphic EBV-Driven Lymphoproliferation
Source: MDPI journal article supplement (doi:10.3390/cancers15123083), 2023-06-07
Supplement: s1 [file s1]

**a**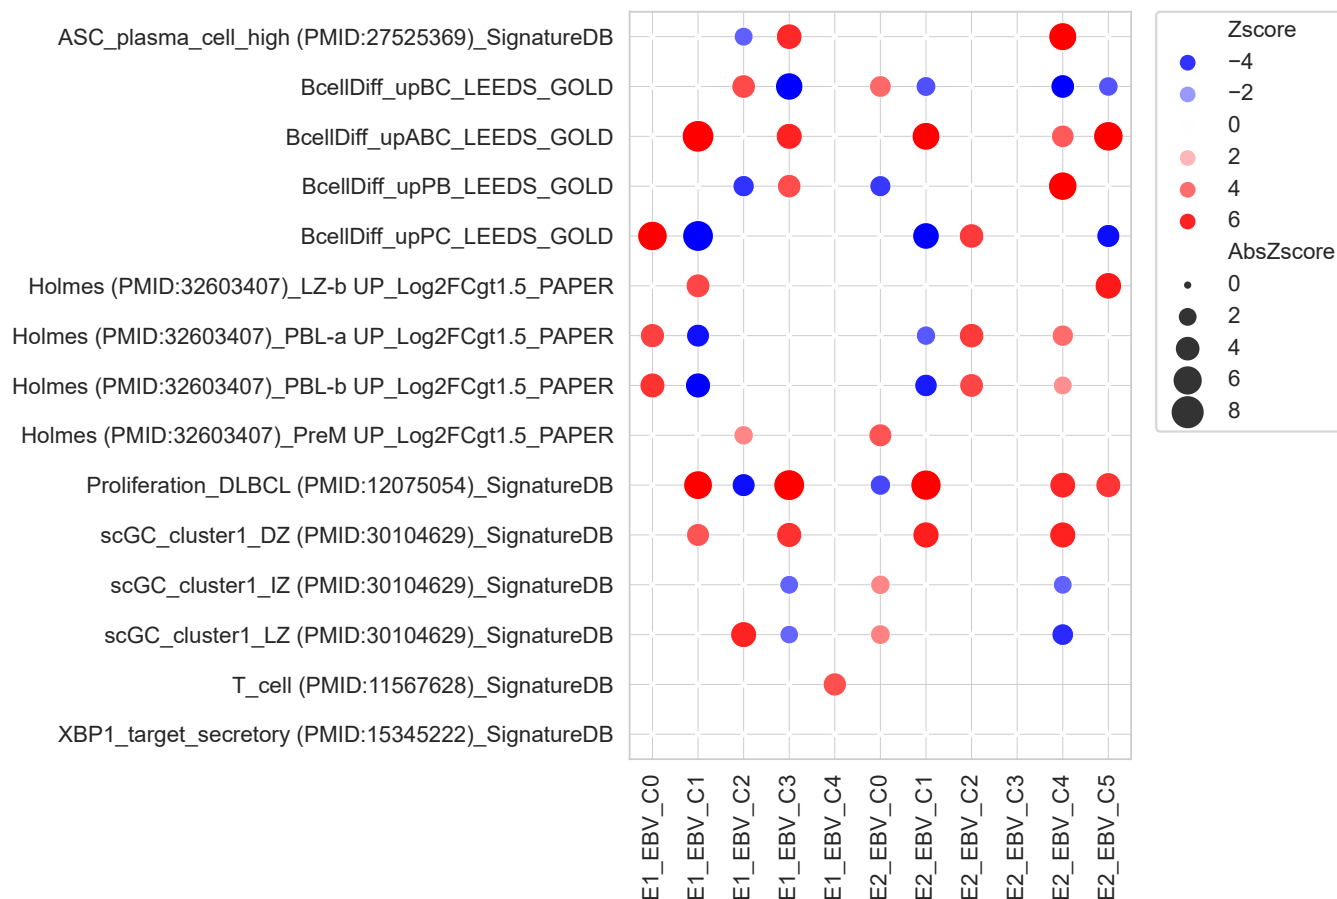**b**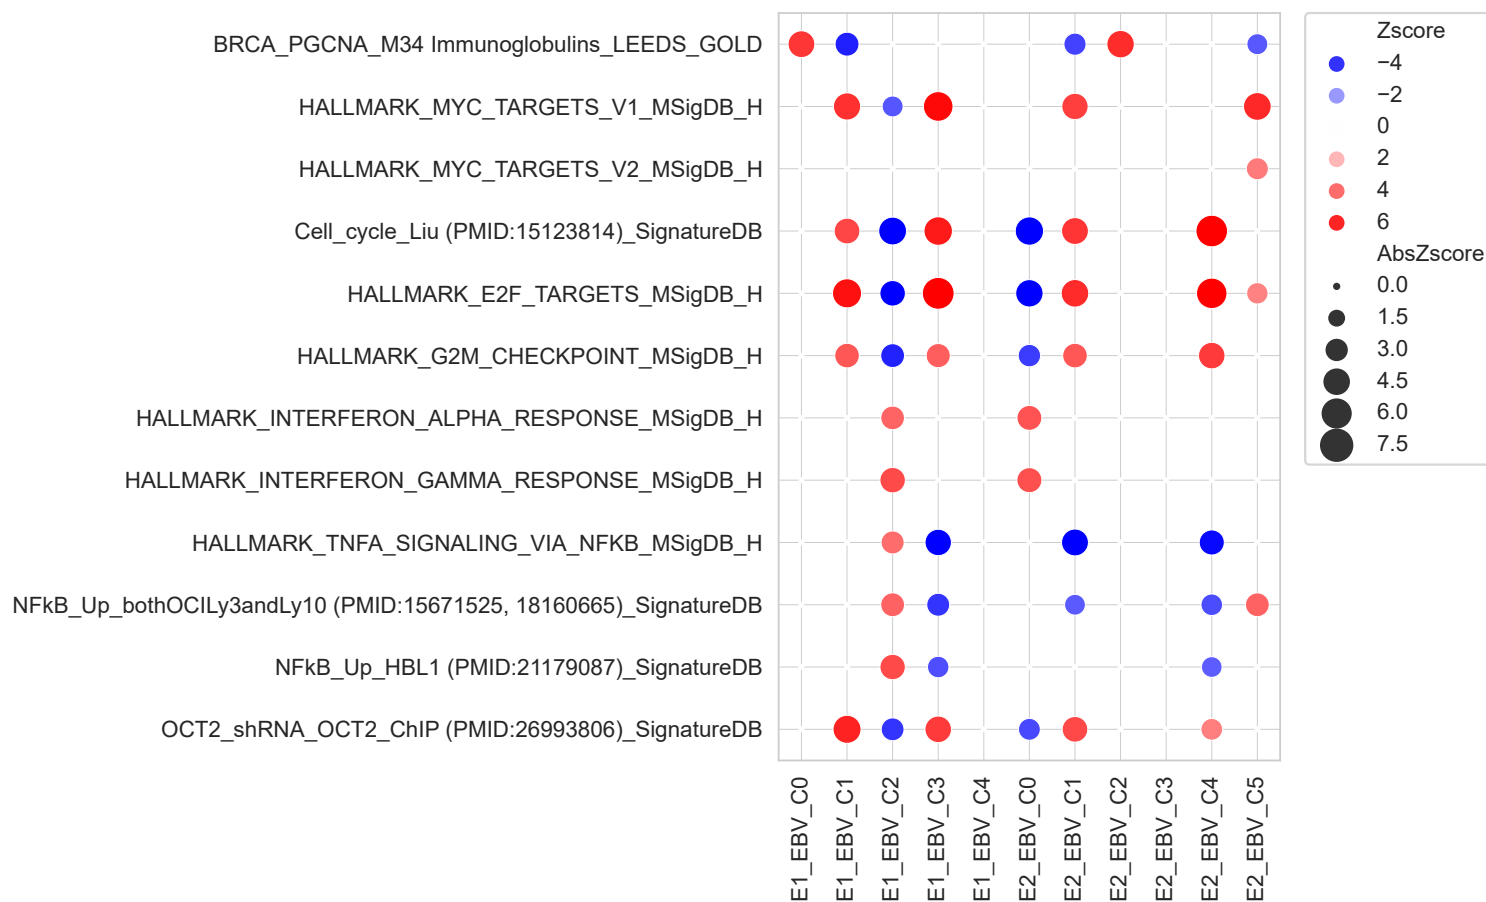

**Supplemental Figure 4. Select gene signature associations for EBV-associated cell clusters in E1 and E2:** the bubble-plot illustrates select signature enrichments across the identified cell clusters for E1 and E2, upper part of figure illustrates signature terms related to B-cell differentiation states, lower part of figure illustrates signatures related to selected pathways as indicated on the left of the figure. Significant enrichment is illustrated on a blue to red colour scale (Z-score) with bubble size reflecting FDR significance.
