# Supplementary material for: Spontaneous EBV-Reactivation during B Cell Differentiation as a Model for Polymorphic EBV-Driven Lymphoproliferation
Source: MDPI journal article supplement (doi:10.3390/cancers15123083), 2023-06-07
Supplement: s1 [file s1]

**a**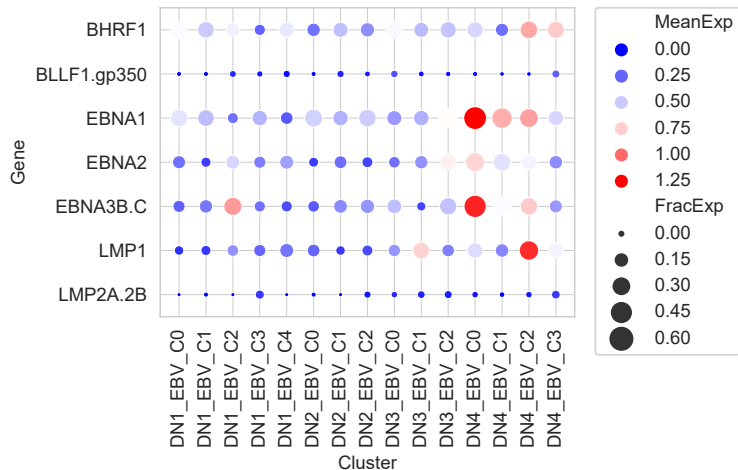**b**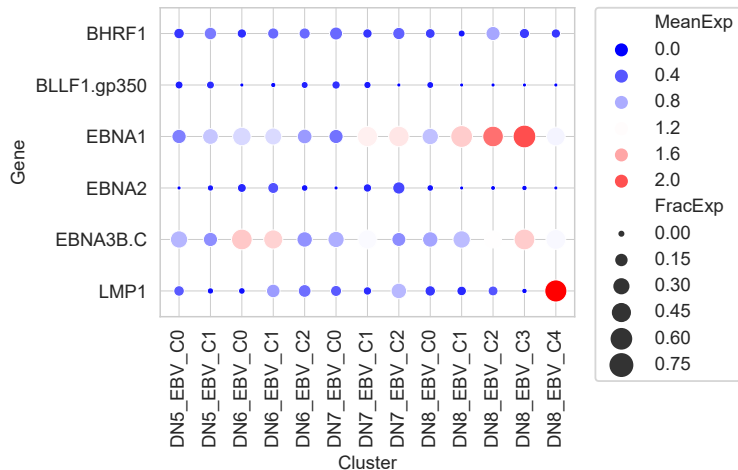

**Supplemental Figure 9. EBV gene expression across donor level cell clusters:** the bubble-plot illustrates the pattern of EBV gene expression observed across the donor level cell clusters a) in experiment 1 and b) experiment 2. EBV gene identities are identified on the left, and cluster identities along the lower edge of each plot. Mean gene expression is illustrated on a normalised scale across the cell cluster (blue 0.00 to red 1.25) and fraction of cells in the cluster with expression is illustrated by size as indicated in the legend.
